# Supplementary material for: A Sm-MOF/GO nanocomposite membrane for efficient organic dye removal from wastewater
Source: Royal Society of Chemistry journal article supplement (doi:10.1039/d0ra01110j), 2020-01-01
Supplement: d0ra01110j1.pdf [file d0ra01110j1.pdf]

## Supporting Information

### **A Sm-MOF/GO Nanocomposite Membrane for Efficient Organic Dyes Removal from Wastewater**

Guohai Yang<sup>\*#</sup>, Daqing Zhang<sup>#</sup>, Gen Zhu, Tingrong Zhou, Manting Song, Lulu Qu,  
Kecai Xiong<sup>\*</sup>, Haitao Li<sup>\*</sup>

School of Chemistry and Material Science, Jiangsu Normal University, Xuzhou  
221116, China

<sup>\*</sup>To whom correspondence should be addressed:

E-mail: yangguohai@jsnu.edu.cn; kcxiong@jsnu.edu.cn; haitao@jsnu.edu.cn

<sup>#</sup> These authors contributed equally to this work

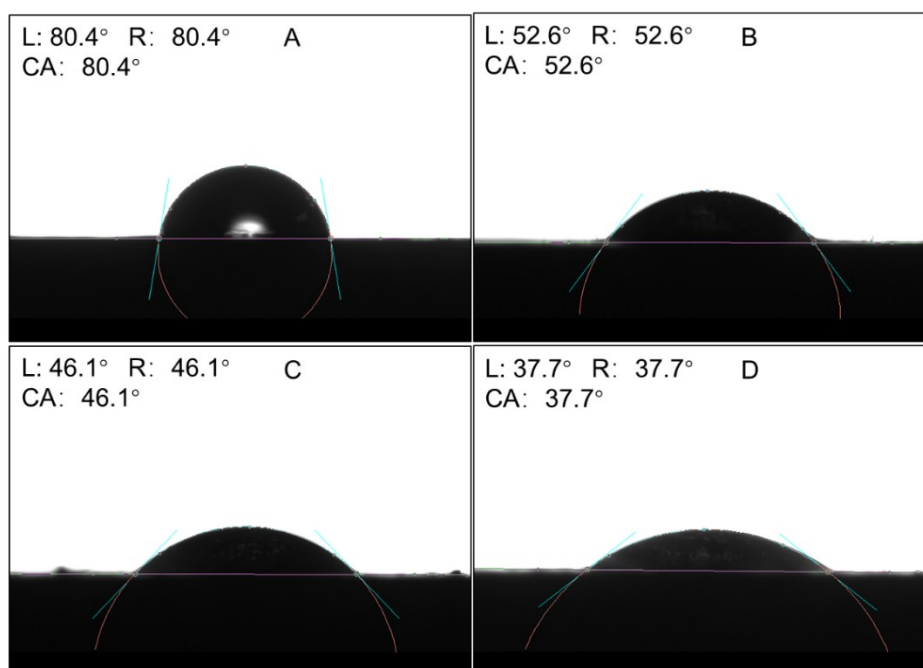

Figure S1. The water contact angles of (A) GO membrane, (B) M-0.18, (C) M-0.31, and (D) M-0.61, respectively.

Table S1. Theoretical and experimental values of Sm-MOF on GO.

| Material           | M-0.18 | M-0.31 | M-0.41 | M-0.58 | M-0.61 |
|--------------------|--------|--------|--------|--------|--------|
| Theoretical value  | 0.18   | 0.31   | 0.41   | 0.58   | 0.61   |
| Experimental value | 0.15   | 0.20   | 0.24   | 0.36   | 0.59   |

Table S2. The pristine and after water cleaning-pure water permeance of the M-0.31 for BSA treatment.

| Filtrating parameters                                                                   | M-0.31 |
|-----------------------------------------------------------------------------------------|--------|
| Pristine pure water permeance<br>( $L m^{-2} \cdot h^{-1} \cdot bar^{-1}$ )             | 100.14 |
| Pure water permeance after water cleaning<br>( $L m^{-2} \cdot h^{-1} \cdot bar^{-1}$ ) | 65.63  |
| Pure water permeance recovery rate<br>(%)                                               | 65.54  |
